# Supplementary material for: Integrative analysis reveals structural basis for transcription activation of Nurr1 and Nurr1-RXRα heterodimer
Source: PubMed Central journal article supplement — Proc Natl Acad Sci U S A. 2022 Nov 29;119(49):e2206737119. doi: 10.1073/pnas.2206737119 (PMC9894219; doi:10.1073/pnas.2206737119), 2022-11-29
Supplement: pnas.2206737119.sapp.pdf [file pnas.2206737119.sapp.pdf]

**Table S1 | Data collection and refinement statistics**

|                                                       | Nurr1-NBRE                      |
|-------------------------------------------------------|---------------------------------|
| PDB entry                                             | 7WNH                            |
| <i>Data collection</i>                                | SSRF BL19U1                     |
| Wavelength (Å)                                        | 0.97775                         |
| Space group                                           | $P3_2$                          |
| Unit cell (Å, °)                                      | $a = b = 124.0,$<br>$c = 119.5$ |
| Molecules per asymmetric unit                         | 4                               |
| Resolution range (Å) <sup>a</sup>                     | 119.52-3.10 (3.24-3.10)         |
| Unique reflections                                    | 37212                           |
| Completeness (%)                                      | 99.7 (99.9)                     |
| $\langle I/\sigma(I) \rangle$                         | 7.9 (1.8)                       |
| $R_{\text{pim}}^{\text{b}}$ (%)                       | 5.6 (37.9)                      |
| Average redundancy                                    | 9.6 (9.7)                       |
| <i>Refinement statistics</i>                          |                                 |
| Resolution range (Å)                                  | 107.39-3.10                     |
| $R$ -factor <sup>c</sup> / $R$ -free <sup>d</sup> (%) | 22.3/26.7                       |
| RMSD <sup>e</sup> bond lengths (Å)                    | 0.007                           |
| RMSD bond angles (°)                                  | 1.449                           |
| Mean $B$ factor (Å <sup>2</sup> )                     |                                 |
| protein                                               | 91.4                            |
| DNA                                                   | 88.4                            |
| water                                                 | 51.0                            |
| <i>Ramachandran plot</i>                              |                                 |
| Most favored (%)                                      | 91.7                            |
| Additional allowed (%)                                | 7.7                             |
| Outlier                                               | 0.6                             |

<sup>a</sup> The values in parentheses refer to statistics in the highest resolution bin.

<sup>b</sup>  $R_{\text{pim}}$  is the precision-indication merging  $R$  factor.

<sup>c</sup>  $R$ -factor =  $\sum_h |\text{Fo}(h) - \text{Fc}(h)| / \sum_h \text{Fo}(h)$ , where  $\text{Fo}$  and  $\text{Fc}$  are the observed and calculated structure-factor amplitudes, respectively.

<sup>d</sup>  $R$ -free was calculated with randomly excluded 5% of data.

<sup>e</sup> Root-mean square-deviation from ideal values.

**Table S2 | SAXS sample details and parameters**

| Data Collection Parameters   |                                    |                       |
|------------------------------|------------------------------------|-----------------------|
| SEC-SAXS column              | Superdex 200 Increase 10/300GL     |                       |
| Loading concentration        | 7 mg/mL                            |                       |
| Flow rate                    | 0.3 mL/min                         |                       |
| Solvent                      | 20 mM Tris-HCl, pH7.5, 150 mM NaCl |                       |
| Structural Parameters        |                                    |                       |
| From Guinier fit             | I(0) (cm <sup>-1</sup> )           | 0.025±0.00014         |
|                              | Rg (Å)                             | 33.51±0.27            |
| From <i>P(r)</i>             | I(0) (cm <sup>-1</sup> )           | 0.2548E-01±0.9566E-04 |
|                              | Rg (Å)                             | 34.42±0.03            |
|                              | Dmax (Å)                           | 98.74                 |
| Molecular Mass Determination |                                    |                       |
| MM (kDa) from Q(p)           | 44.105                             |                       |
| MM (kDa) from V(c)           | 39.01                              |                       |
| Estimate MW (kDa)            | 42.85                              |                       |
| Modeling                     |                                    |                       |
| DAMMIN                       | $\chi^2$                           | 1.061                 |
|                              | NSD                                | 1.054±0.087           |
|                              | Ensemble Resolution                | 41±3                  |
| CRY SOL                      | $\chi^2$                           | 1.9                   |

**Table S3. The interfaces Edges of Nurr1-RXR $\alpha$  model**

| <b>Nurr1-<br/>LBD</b> | <b>RXR<math>\alpha</math>-<br/>LBD</b> | <b>Nurr1-<br/>DBD</b> | <b>RXR<math>\alpha</math>-<br/>DBD</b> | <b>Nurr1-<br/>LBD</b> | <b>RXR<math>\alpha</math>-<br/>DBD</b> | <b>Nurr1-<br/>DBD</b> | <b>RXR<math>\alpha</math>-<br/>LBD</b> |
|-----------------------|----------------------------------------|-----------------------|----------------------------------------|-----------------------|----------------------------------------|-----------------------|----------------------------------------|
| T513                  | L420                                   | Y297                  | N174                                   | N542                  | L178                                   | P306                  | A387                                   |
| E514                  | K417                                   | R310                  | E219                                   | N543                  | D176                                   | R310                  | E388                                   |
| E514                  | L420                                   | R312                  | T170                                   | G545                  | A197                                   | R311                  | E388                                   |
| E514                  | R421                                   | N313                  | T170                                   | L546                  | K194                                   |                       |                                        |
| Q528                  | G413                                   | N313                  | C171                                   | L546                  | A197                                   |                       |                                        |
| N529                  | P412                                   | R314                  | N174                                   | L546                  | M198                                   |                       |                                        |
| V532                  | P412                                   | R314                  | K175                                   | N547                  | K175                                   |                       |                                        |
| N550                  | E394                                   | R314                  | S129                                   | N547                  | D176                                   |                       |                                        |
| N550                  | V396                                   | C315                  | N174                                   | N547                  | C177                                   |                       |                                        |
| S553                  | Y397                                   | Q316                  | N174                                   | N547                  | Q193                                   |                       |                                        |
| S553                  | A398                                   | R341                  | D173                                   | R548                  | K175                                   |                       |                                        |
| S553                  | E401                                   | R341                  | N174                                   | P549                  | Q193                                   |                       |                                        |
| S553                  | F415                                   | R341                  | D176                                   | P549                  | A197                                   |                       |                                        |
| K554                  | E394                                   | G343                  | D176                                   |                       |                                        |                       |                                        |
| L556                  | F415                                   | R344                  | D176                                   |                       |                                        |                       |                                        |
| L556                  | L419                                   | P358                  | M198                                   |                       |                                        |                       |                                        |
| G557                  | Y397                                   |                       |                                        |                       |                                        |                       |                                        |
| G557                  | L419                                   |                       |                                        |                       |                                        |                       |                                        |
| L559                  | A416                                   |                       |                                        |                       |                                        |                       |                                        |
| L559                  | L420                                   |                       |                                        |                       |                                        |                       |                                        |
| P560                  | L419                                   |                       |                                        |                       |                                        |                       |                                        |
| P560                  | P423                                   |                       |                                        |                       |                                        |                       |                                        |
| R563                  | L420                                   |                       |                                        |                       |                                        |                       |                                        |
| R563                  | P423                                   |                       |                                        |                       |                                        |                       |                                        |
| T564                  | P423                                   |                       |                                        |                       |                                        |                       |                                        |

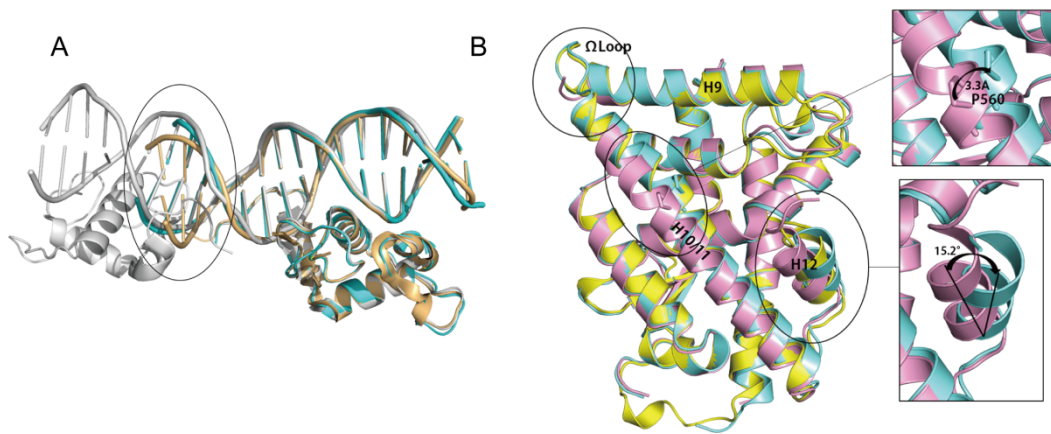

**Fig. S1 | Superposition analysis of Nurr1-NBRE structure** (A) Superposition of Nurr1 DBD binding with NBRE (cyan), rat NGFI-B (light orange, PDB: 1CIT) and Nurr1 DBD binding with inverted repeat element (grey, PDB: 6L6Q). (B) Superposition of LBD in Nurr1258-NBRE (aquamarine, chain D, pink, chain C) and previously reported apo Nurr1 LBD (yellow, PDB:1OVL (11)).

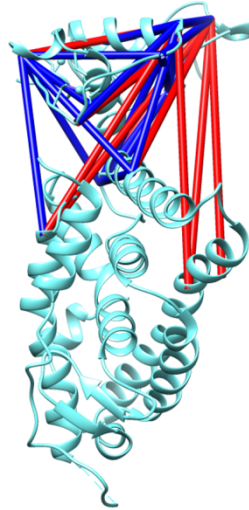

**Fig. S2 | High-confidence crosslinks of Nurr1 without DNA binding were labeled on Form 1. Dark blue for the satisfied crosslinks and red for the violated ones.**

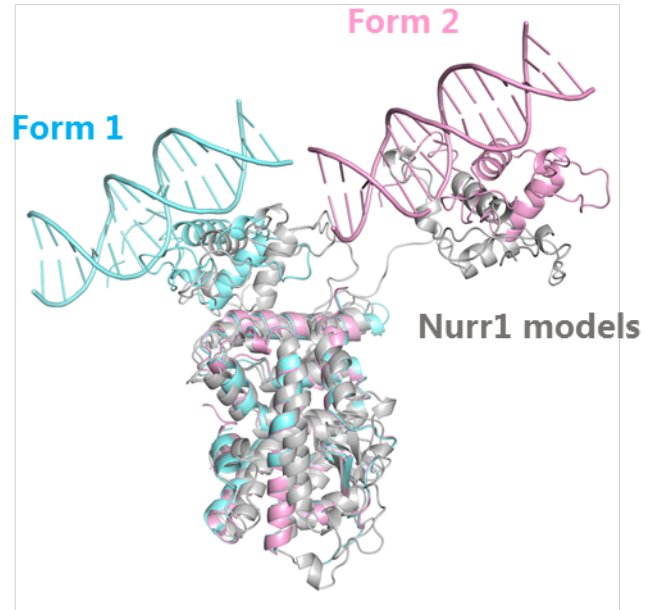

**Fig. S3 | MD analysis of Nurr1 monomer structure.** Models (grey) identified in MD trajectories starting from the Nurr1<sub>258</sub> Form 1 are similar to the two Nurr1 structures, Form 1 (aquamarine) and Form 2 (pink).

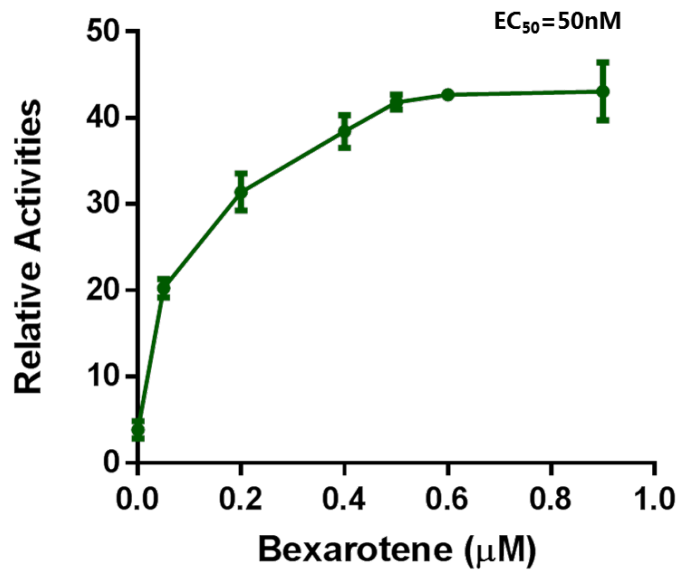

**Fig. S4 | Dose-response of Bexarotene on the transcription activity.** The EC<sub>50</sub> of Bexarotene was measured in 293T cells co-transfected with IR5-driven luciferase reporter plasmid and full-length Nurr1 and RXR $\alpha$  plasmids.

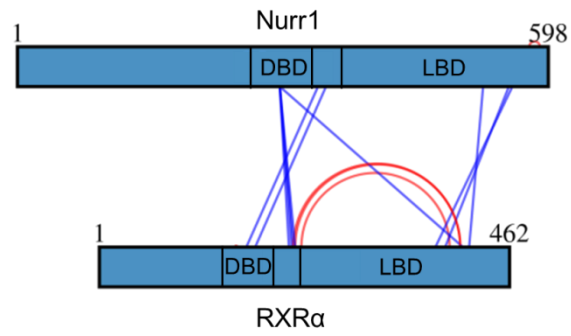

**Fig. S5 | Map of high-confidence EDC crosslinked residues shown schematically on the Nurr1 and RXR $\alpha$ .** Dark blue lines connected the intermolecular crosslinked peptides; red arc connected the intramolecular crosslinked peptides.



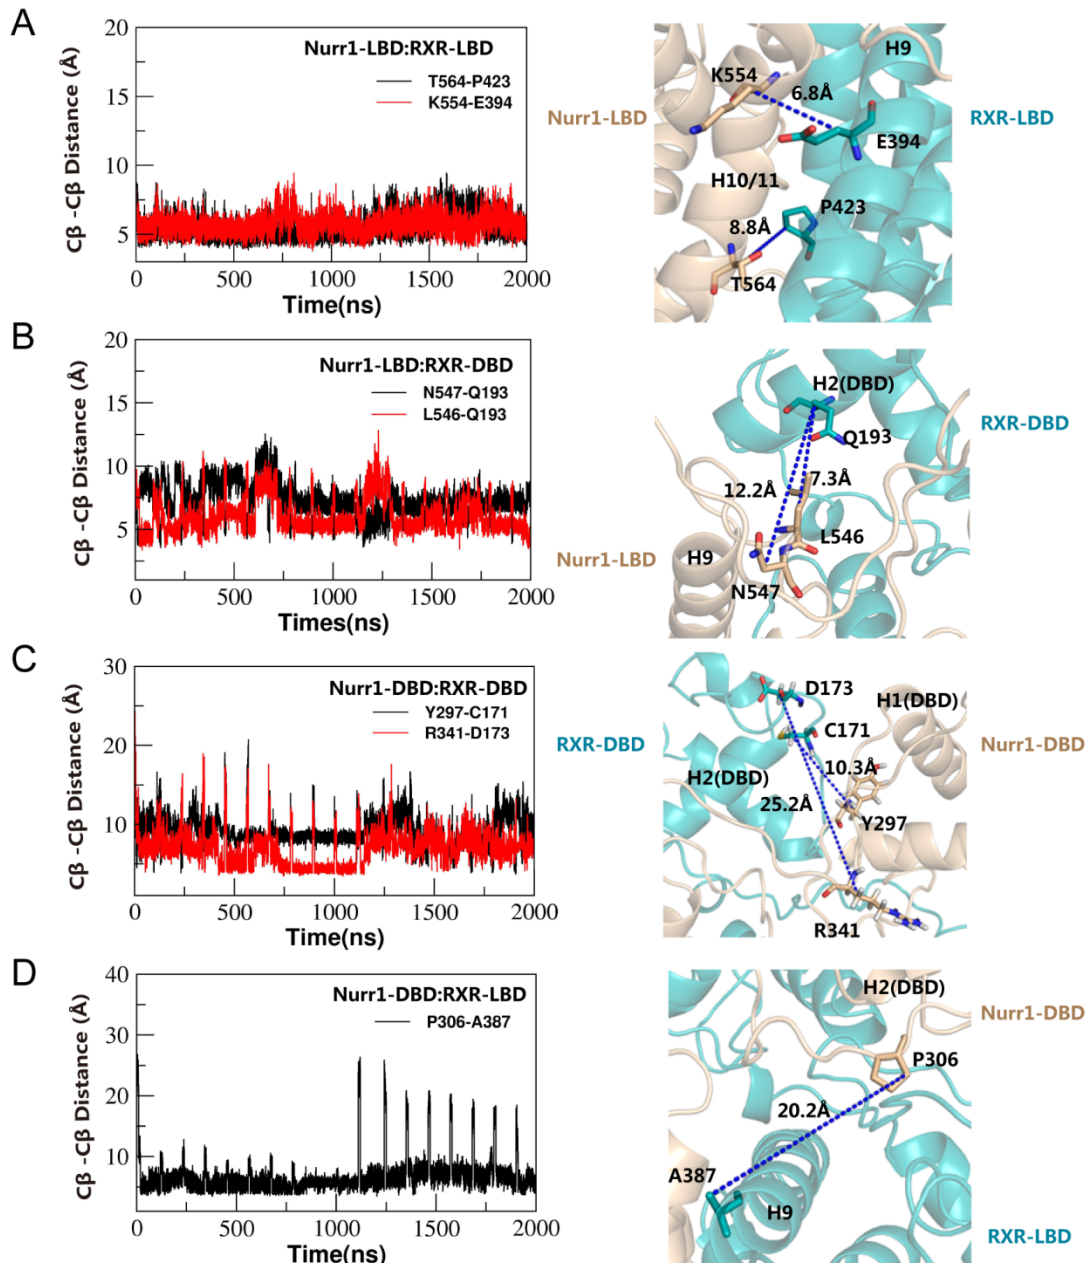

**Fig. S6 | Analysis of the inter-domain contacts in the Nurr1-RXR $\alpha$  Model.** C $\beta$  atom distances of residue pairs from inter-domain interfaces during MD simulation of the Nurr1-RXR $\alpha$  heterodimer model (left panel) and distances measured from the model (right panel), (A) Nurr1-LBD: RXR $\alpha$ -LBD interface. (B) Nurr1-LBD: RXR $\alpha$ -DBD interface. (C) Nurr1-DBD: RXR $\alpha$ -DBD interface. (D) Nurr1-DBD: RXR $\alpha$ -LBD interface.

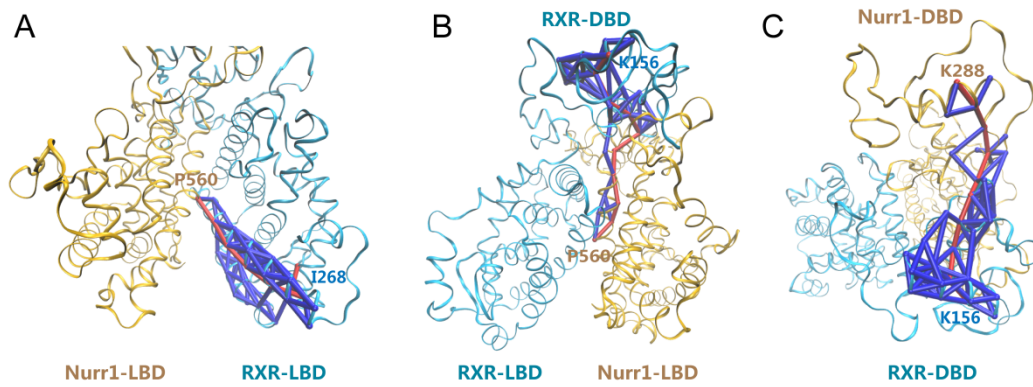

**Fig. S7 | Optimal and suboptimal path analysis reveals coupling routes between Nurr1 and RXR $\alpha$ .** (A) Nurr1-LBD and RXR $\alpha$ -LBD. (B) Nurr1-LBD and RXR $\alpha$ -DBD. (C) Nurr1-DBD and RXR $\alpha$ -DBD. Optimal paths were highlighted by red and suboptimal paths were colored blue. The source and sink nodes of Nurr1 and RXR $\alpha$  were labeled.

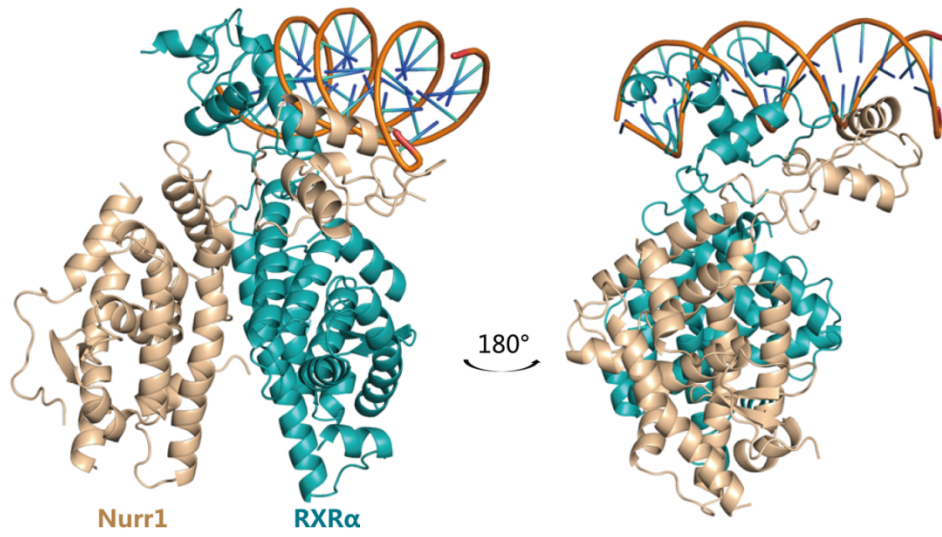

**Fig. S8 | Nurr1-RXRα-IR5 model generated by Paradock. Nurr1, wheat; RXRα, teal; IR5, orange.**

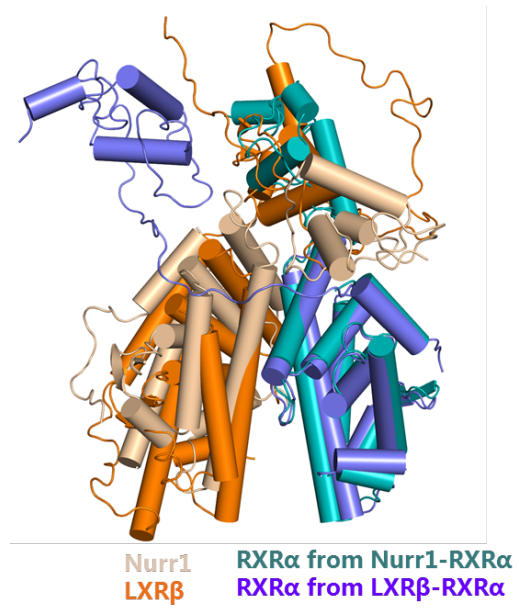

**Fig. S9 | Superposition of LXRβ-RXRα and Nurr1-RXRα model.** Nurr1(wheat), LXRβ(orange), RXRα of Nurr1-RXRα (teal), RXRα of LXRβ-RXRα (purple).

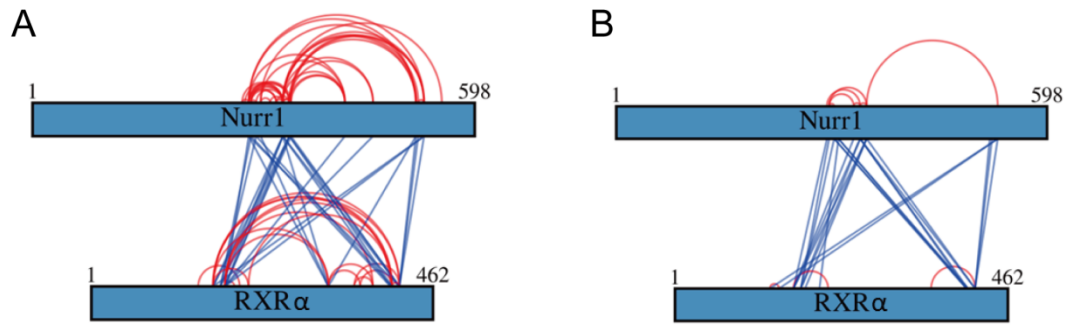

**Fig. S10 | Map of high-confidence BS3 crosslinked residues shown schematically on the Nurr1 and RXR $\alpha$  sequence, dark blue lines connected the intermolecular crosslinked peptides, red arc connected the intramolecular crosslinked peptides.**

(A) Crosslinking sample of Nurr1-RXR $\alpha$  heterodimer without Bexarotene. (B) Crosslinking sample of Nurr1-RXR $\alpha$  heterodimer incubated with Bexarotene.
